# Supplementary material for: Pan-cancer analysis reveals that G6PD is a prognostic biomarker and therapeutic target for a variety of cancers
Source: Frontiers journal article supplement (doi:10.3389/fonc.2023.1183474), 2023-08-03
Supplement: Data_Sheet_1.zip [file Table S1.xlsx]

## Sheet: Sheet1
Table S1. Clinicopathological characteristics of clinical samples and expression of G6PD in LIHC
Characteristics		No. Patients	%
Age (years)	≤ 50	22	28.6
	> 50	55	71.4
Gender	Male	58	75.3
	Female	19	24.7
TNM classification	Ⅰ	36	46.8
	Ⅱ	12	15.6
	Ⅲ	24	31.2
	Ⅳ	5	6.5
Tumor size	> 3 cm	12	15.6
	≤ 3 cm	65	84.4
Tumor number	> 1	11	13.3
	=1	66	86.7
Vascular invasion	Positive	37	48.1
	Negative	40	51.9
Tumor recurrence	Positive	48	62.3
	Negative	29	37.7
Vital status (at follow-up)	Alive	53	68.8
	Death due to LIHC	24	31.2
Expression of G6PD	High expression	56	72.7
	Low expression	21	27.3
