# Supplementary material for: Pan-cancer analysis reveals that G6PD is a prognostic biomarker and therapeutic target for a variety of cancers
Source: Frontiers journal article supplement (doi:10.3389/fonc.2023.1183474), 2023-08-03
Supplement: Data_Sheet_1.zip [file Table S2.xlsx]

## Sheet: Sheet1
Table S2. The complete information of GSEA enrichment analysis
Gene sets	Cancer Type	ES	NES	NP	FDR	FWER
HALLMARK_UV_RESPONSE_UP	BLCA	0.4353	1.8184	0.002	0.0261	0.123
	BRCA	0.4299	1.7392	0.0063	0.0511	0.217
	HNSC	0.3584	1.4998	0.0325	0.1833	0.56
	KIRC	0.4121	1.7596	0.0192	0.0844	0.252
	KIRP	0.4531	1.8026	0.0019	0.0416	0.137
	LAML	0.4377	1.7356	0.0059	0.0404	0.19
	LGG	0.4515	1.797	0.0041	0.0272	0.1
	LIHC	0.4472	1.7984	0	0.0304	0.101
	MESO	0.3786	1.5306	0.0227	0.1763	0.447
HALLMARK_REACTIVE_OXYGEN_SPECIES_PATHWAY	BLCA	0.7141	2.3474	0	0	0
	BRCA	0.6552	2.1664	0	0.0043	0.005
	HNSC	0.635	1.9657	0.002	0.024	0.033
	KIRC	0.5702	1.9548	0.0076	0.05	0.1
	KIRP	0.7511	2.3293	0	0	0
	LAML	0.6222	2.2688	0	0.0027	0.002
	LGG	0.6949	2.1916	0	0.0021	0.001
	LIHC	0.4751	1.6558	0.0269	0.0623	0.285
	MESO	0.5868	1.9437	0	0.0414	0.019
REACTOME_METABOLISM_OF_CARBOHYDRATES	BLCA	0.4158	1.8603	0	0.0235	0.751
	BRCA	0.3703	1.6582	0.002	0.1449	0.98
	HNSC	0.4038	1.7296	0.004	0.1939	0.959
	KIRC	0.388	1.7933	0.0166	0.0534	0.869
	KIRP	0.4249	1.8295	0	0.0388	0.737
	LAML	0.3308	1.5368	0.0217	0.1489	0.999
	LGG	0.4293	1.7968	0.002	0.0613	0.828
	LIHC	0.4244	1.7247	0	0.0743	0.911
	MESO	0.3476	1.4675	0.0181	0.3078	1
LIN_APC_TARGETS	BLCA	0.5042	1.8064	0.002	0.0327	0.868
	BRCA	0.5973	1.9258	0.0083	0.0366	0.639
	HNSC	0.4324	1.603	0.0292	0.2802	0.997
	KIRC	0.655	2.2942	0.002	0.0074	0.051
	KIRP	0.5517	1.7818	0.008	0.0505	0.828
	LAML	0.6542	2.2558	0	0.0195	0.059
	LGG	0.6809	2.1398	0	0.0057	0.034
	LIHC	0.4964	1.7431	0.0084	0.0714	0.879
	MESO	0.4739	1.871	0.0043	0.1024	0.551
GOBP_GLUCOSE_6_PHOSPHATE_METABOLIC_PROCESS	BLCA	0.7334	2.3089	0	0.0021	0.003
	BRCA	0.6672	2.0766	0	0.0875	0.299
	HNSC	0.7867	2.153	0	0.0156	0.059
	KIRC	0.6654	2.1827	0	0.0155	0.167
	KIRP	0.7591	2.3028	0	0.0014	0.002
	LAML	0.585	1.8922	0.0041	0.0321	0.795
	LGG	0.6006	1.9133	0.002	0.1471	0.603
	LIHC	0.5499	1.6974	0.0105	0.1061	0.956
	MESO	0.5113	1.5918	0.0299	0.5906	0.995
HP_MIDDLE_AGE_ONSET	BLCA	0.6171	2.1263	0	0.0127	0.126
	BRCA	0.5472	1.9221	0.0021	0.1782	0.714
	HNSC	0.439	1.5265	0.0242	0.2654	1
	KIRC	0.5877	2.2167	0	0.0135	0.128
	KIRP	0.4518	1.5668	0.0275	0.2629	0.999
	LAML	0.467	1.6171	0.0178	0.1106	1
	LGG	0.4657	1.6285	0.0207	0.138	0.999
	LIHC	0.4676	1.6221	0.0143	0.094	0.986
	MESO	0.4601	1.5797	0.0205	0.5995	0.997
NAIVE_VS_MEMORY_BCELL_DN	BLCA	0.4402	1.9062	0	0.0073	0.216
	BRCA	0.4523	1.9376	0.002	0.0434	0.264
	HNSC	0.3926	1.6135	0.0143	1	0.745
	KIRC	0.4295	1.8427	0.0139	0.0338	0.467
	KIRP	0.4631	1.9053	0.004	0.0166	0.224
	LAML	0.4321	1.96	0	0.0081	0.27
	LGG	0.4305	1.7238	0.0102	0.029	0.51
	LIHC	0.4632	1.8276	0	0.0035	0.19
	MESO	0.4045	1.7832	0.0039	0.0287	0.349
OT1_VS_HY_CD8AB_THYMOCYTE_RTOC_CULTURE_UP	BLCA	0.4277	1.897	0	0.0078	0.224
	BRCA	0.4299	1.9283	0	0.0409	0.278
	HNSC	0.3561	1.5117	0.0321	0.8158	0.862
	KIRC	0.42	1.9343	0.002	0.0253	0.342
	KIRP	0.488	2.0978	0	0.0043	0.042
	LAML	0.4038	1.7626	0.004	0.0241	0.645
	LGG	0.4203	1.6918	0.004	0.0329	0.577
	LIHC	0.4734	1.8464	0	0.0032	0.158
	MESO	0.3664	1.5021	0.024	0.1331	0.868
gene_sets.gmt#GSE37563_WT_VS_CTLA4_KO_CD4_TCELL_D4_POST_IMMUNIZATION_DN	BLCA	0.5571	2.3507	0	0	0
	BRCA	0.45	1.951	0	0.0418	0.246
	HNSC	0.3935	1.6048	0.0145	1	0.757
	KIRC	0.4916	2.1742	0	0.0095	0.09
	KIRP	0.4912	1.9672	0	0.0111	0.136
	LAML	0.4103	1.7155	0.0181	0.0309	0.716
	LGG	0.4888	1.8656	0	0.0163	0.236
	LIHC	0.5591	1.9446	0	0.0019	0.068
	MESO	0.4452	1.6372	0.0285	0.0736	0.652
BTLA_POS_VS_NEG_INTRATUMORAL_CD8_TCELL_UP	BLCA	0.5632	2.2297	0	0.0002	0.005
	BRCA	0.5243	2.0979	0	0.033	0.088
	HNSC	0.4146	1.6656	0.0117	1	0.652
	KIRC	0.5403	2.1013	0.002	0.013	0.147
	KIRP	0.6878	2.5757	0	0	0
	LAML	0.5153	2.0117	0.004	0.0061	0.2
	LGG	0.5894	2.0343	0	0.007	0.051
	LIHC	0.5348	2.0077	0	0.0019	0.025
	MESO	0.4494	1.9224	0.006	0.011	0.111
NAIVE_VS_IGM_MEMORY_BCELL_DN	BLCA	0.4394	1.9347	0	0.006	0.178
	BRCA	0.4949	2.152	0	0.0471	0.048
	HNSC	0.3745	1.6254	0.0081	1	0.729
	KIRC	0.4845	2.1597	0	0.0092	0.105
	KIRP	0.4241	1.7803	0.004	0.0354	0.426
	LAML	0.5186	2.2162	0	0.0017	0.047
	LGG	0.4352	1.7712	0.002	0.0243	0.414
	LIHC	0.4504	1.7754	0.0021	0.005	0.276
	MESO	0.4465	1.8898	0.0019	0.0143	0.161
HOEK_NEUTROPHIL_2011_2012_TIV_ADULT_1DY_DN	BLCA	0.4516	1.7784	0.002	0.0173	0.459
	BRCA	0.5331	1.8738	0.0042	0.0433	0.373
	HNSC	0.4159	1.4798	0.0438	0.7786	0.89
	KIRC	0.4349	1.7909	0.0079	0.039	0.542
	KIRP	0.4584	1.7024	0.0119	0.0527	0.561
	LAML	0.5025	1.7092	0.0082	0.032	0.728
	LGG	0.5559	2.03	0	0.0073	0.054
	LIHC	0.4823	1.7173	0.0039	0.0076	0.378
	MESO	0.4742	1.7069	0.0019	0.0496	0.498
UNTREATED_VS_6H_NOD2_LIGAND_TREATED_MONOCYTE_UP	BLCA	0.3854	1.7525	0.0039	0.0199	0.506
	BRCA	0.3732	1.6021	0.0082	0.0977	0.812
	HNSC	0.4116	1.688	0.0039	1	0.616
	KIRC	0.4345	1.9375	0.0041	0.0253	0.339
	KIRP	0.3872	1.6044	0.0122	0.0814	0.702
	LAML	0.531	2.2522	0	0.0015	0.036
	LGG	0.4268	1.763	0.002	0.0255	0.435
	LIHC	0.4482	1.6913	0.0041	0.0092	0.423
	MESO	0.3799	1.6777	0	0.0594	0.565
ES, Enrichment score; NES, standardized enrichment score; NP, nominal p-value; FDR, false discovery rate; FWER, Family-wise error rate.
