# Supplementary material for: Pan-cancer analysis reveals that G6PD is a prognostic biomarker and therapeutic target for a variety of cancers
Source: Frontiers journal article supplement (doi:10.3389/fonc.2023.1183474), 2023-08-03
Supplement: Data_Sheet_1.zip [file Table S3.xlsx]

## Sheet: correlation
Table S3. Detailed drug sensitivity analysis data
drug	cor	p.value	method	sig
Tanespimycin	-0.334097	0	spearman	****
HG-6-71-01	-0.230227	0.00934669	spearman	****
torin2	-0.222037	0.0122522	spearman	****
Dasatinib	-0.220678	1.49e-05	spearman	****
EphB4_9721	-0.215124	7.14e-11	spearman	*
Trametinib	-0.206451	9.67e-10	spearman	*
AZD8931	-0.20383	7.58e-10	spearman	*
Dyrk1b_0191	-0.169696	3.07e-07	spearman	*
TGX221	-0.169546	0.000824123	spearman	****
PD0325901	-0.166891	4.97e-07	spearman	*
Refametinib	-0.163617	6.31e-12	spearman	*
FH535	-0.149644	1.25e-05	spearman	****
Serdemetan	-0.149298	6.47e-06	spearman	*
Docetaxel	-0.148184	7e-06	spearman	*
Bortezomib	-0.143475	0.00496099	spearman	****
FGFR_0939	-0.139359	2.64e-05	spearman	*
WH-4-023	-0.13763	0.0070994	spearman	****
Selumetinib	-0.136542	9.49e-09	spearman	*
CCT245232	-0.132532	6.21e-05	spearman	*
Cetuximab	-0.129397	0.000158318	spearman	****
A-770041	-0.12629	0.0131888	spearman	****
AZD1332	-0.124522	0.000177865	spearman	****
JNJ38877605	-0.123797	0.000207259	spearman	****
Bleomycin (10 uM)	-0.122866	0.000218712	spearman	****
Lapatinib	-0.118627	0.0201063	spearman	****
Elesclomol	-0.111058	0.000839744	spearman	****
KU-60019	-0.107702	0.00115186	spearman	****
TANK_1366	-0.098497	0.00307486	spearman	****
Bleomycin (50 uM)	-0.0964101	0.00370748	spearman	****
CRT0105446	-0.0947512	0.00432397	spearman	****
FS112	-0.0943074	0.00446581	spearman	****
Temsirolimus	-0.0938935	0.00492493	spearman	****
Midostaurin	-0.0928892	0.00642753	spearman	****
AZD6482	-0.0826812	0.000553702	spearman	****
Palbociclib	-0.0815284	0.016119	spearman	****
Afatinib	-0.0806041	0.000626027	spearman	****
RO-3306	-0.075347	0.0227239	spearman	****
CI-1040	-0.0739165	0.026612	spearman	****
PARP_9495	-0.0701832	0.0358087	spearman	****
Dactolisib	-0.0701612	0.035352	spearman	****
FY012	0.0681494	0.0411934	spearman	****
Wnt-C59	0.069424	0.0387321	spearman	****
Rucaparib	0.0695037	0.0361739	spearman	****
Bicalutamide	0.0714489	0.0031944	spearman	****
Enzastaurin	0.0723403	0.0310481	spearman	****
BAY-MPS1	0.0731325	0.0359558	spearman	****
AKT inhibitor VIII	0.0747941	0.00176344	spearman	****
CP724714	0.0755996	0.0239688	spearman	****
AZD7762	0.0767636	0.00106103	spearman	****
EHT-1864	0.0786492	0.0176658	spearman	****
AZD6738	0.0792854	0.0171933	spearman	****
Wee1 Inhibitor	0.0799462	0.0215117	spearman	****
BAY AKT1	0.0852653	0.0144932	spearman	****
ZM447439	0.0856541	0.00955489	spearman	****
IOX2	0.0859831	0.0100025	spearman	****
WHI-P97	0.0870376	0.0093986	spearman	****
Veliparib	0.0886158	0.00736353	spearman	****
PFI-1	0.0897689	0.00712392	spearman	****
JQ1	0.0918362	0.00012498	spearman	****
LDN-193189	0.0937159	0.00523188	spearman	****
(5Z)-7-Oxozeaenol	0.0941745	0.00511406	spearman	****
Avagacestat	0.0948134	5.55e-05	spearman	*
THZ-2-49	0.0967175	0.00415931	spearman	****
KIN001-042	0.0978551	0.00339693	spearman	****
Lenalidomide	0.0982003	0.0029701	spearman	****
Obatoclax Mesylate	0.0988526	0.00410308	spearman	****
I-BET-151	0.0991123	0.00320772	spearman	****
AS605240	0.100162	0.0028654	spearman	****
FY026	0.101214	0.00238916	spearman	****
Nutlin-3a (-)	0.102505	0.00191401	spearman	****
BAY-HDAC11_2	0.102571	0.00325219	spearman	****
LGK974	0.10304	0.00215618	spearman	****
Pilaralisib	0.103314	0.00195578	spearman	****
Entinostat	0.103527	0.0429161	spearman	****
OSU-03012	0.107228	0.00176432	spearman	****
Imatinib	0.107368	0.0336176	spearman	****
Pelitinib	0.110189	0.000992052	spearman	****
BAM7	0.111652	0.00087102	spearman	****
Sepantronium bromide	0.111925	0.00108753	spearman	****
AZD5582	0.111933	0.000816812	spearman	****
HG-5-113-01	0.113081	0.0132121	spearman	****
AZD3514	0.113558	0.000638119	spearman	****
AZD4547	0.11407	1.53e-06	spearman	****
PF-00299804	0.114274	0.000650422	spearman	****
Etoposide	0.114472	0.000787087	spearman	****
Tozasertib	0.115739	0.0240978	spearman	****
LCL161	0.116181	0.000538196	spearman	****
AICA Ribonucleotide	0.116309	0.000455269	spearman	****
NSC-87877	0.116759	0.00062457	spearman	****
CMK	0.117616	0.0210296	spearman	****
SN-38	0.117819	4.85e-07	spearman	*
Lestaurtinib	0.117841	0.000370748	spearman	****
Axitinib	0.118552	0.000346604	spearman	****
Tretinoin	0.118924	0.000342201	spearman	****
CPI-613	0.120033	0.000340413	spearman	****
FTY-720	0.121294	0.00029428	spearman	****
GSK-J4	0.123675	0.000215507	spearman	****
XMD11-85h	0.126566	0.00551651	spearman	****
JAK1_3715	0.127127	0.000128358	spearman	****
Shikonin	0.12864	0.000168532	spearman	****
AZD8055	0.129025	0.000102343	spearman	****
FY069	0.131279	8.37e-05	spearman	*
Olaparib	0.13236	1.87e-08	spearman	****
PHA-665752	0.13525	0.00729009	spearman	****
Voxtalisib	0.13649	4.17e-05	spearman	*
XMD8-92	0.136585	0.00270366	spearman	****
SB590885	0.137092	4.66e-05	spearman	*
FMK	0.137407	0.000138168	spearman	****
ZL049	0.138072	3.39e-05	spearman	*
Nilotinib	0.140345	2.1e-05	spearman	*
Linifanib	0.142235	2.05e-05	spearman	*
BAY-61-3606	0.144459	2.41e-05	spearman	*
Tamoxifen	0.144602	1.44e-05	spearman	****
Kobe2602	0.144616	1.58e-05	spearman	****
BIBF-1120	0.144888	1.37e-05	spearman	****
IC-87114	0.145539	1.32e-05	spearman	****
GSK1059615	0.145701	1.41e-05	spearman	****
QS11	0.147516	1.59e-05	spearman	****
SL0101	0.149283	7.13e-06	spearman	*
Seliciclib	0.15418	0.00250547	spearman	****
AT7867	0.154727	3.32e-06	spearman	*
Idelalisib	0.155833	3.01e-06	spearman	*
ZSTK474	0.156506	2.87e-06	spearman	*
AZD1208	0.156659	2.25e-06	spearman	*
AGI-6780	0.157701	2.33e-06	spearman	*
PD173074	0.159128	1.37e-06	spearman	****
BAY ACCi	0.159144	4.67e-06	spearman	*
ETP-45835	0.159228	1.64e-06	spearman	****
Alectinib	0.159561	1.8e-06	spearman	****
AZD6094	0.164628	6.8e-07	spearman	*
Cyclopamine	0.165273	0.00116779	spearman	****
Vismodegib	0.16698	3.88e-07	spearman	*
Sphingosine Kinase 1 Inhibitor II	0.167864	4.44e-07	spearman	*
Phenformin	0.168456	5.29e-07	spearman	*
Dacinostat	0.168671	7.88e-07	spearman	*
Temozolomide	0.170726	3.59e-07	spearman	*
FEN1_3940	0.171168	2.54e-07	spearman	*
GW-2580	0.17208	2.44e-07	spearman	*
Crizotinib	0.173601	0.000556286	spearman	****
Cabozantinib	0.175516	1.46e-07	spearman	****
Parthenolide	0.176343	0.000484344	spearman	****
Navitoclax	0.177187	7.82e-08	spearman	*
SGC0946	0.177398	1.22e-07	spearman	****
Foretinib	0.177651	1.06e-07	spearman	****
Selisistat	0.177712	9.94e-08	spearman	*
ZG-10	0.178036	8.79e-05	spearman	*
IMD-0354	0.180076	6.69e-08	spearman	*
CP466722	0.180727	5.79e-08	spearman	*
VX-11e	0.18174	5.04e-08	spearman	*
Genentech Cpd 10	0.181783	5e-08	spearman	*
XMD15-27	0.181795	4.82e-08	spearman	*
SU11274	0.182883	3.73e-08	spearman	*
GSK319347A	0.183404	0.000282557	spearman	****
SB52334	0.187828	1.71e-08	spearman	****
Apitolisib	0.188264	1.75e-08	spearman	****
PFI-3	0.188687	5.43e-08	spearman	*
FR-180204	0.190322	1.05e-08	spearman	****
Omipalisib	0.191754	8.37e-09	spearman	*
STF-62247	0.193608	6.46e-09	spearman	*
QL-XII-61	0.194459	2.89e-05	spearman	*
Mirin	0.194497	1.63e-08	spearman	****
MCT1_6447	0.195043	5.72e-09	spearman	*
SB505124	0.196506	6.06e-17	spearman	*
WYE-125132	0.196722	3.88e-09	spearman	*
CAY10566	0.197321	3.62e-09	spearman	*
MetAP2 Inhibitor, A832234	0.197375	3.66e-09	spearman	*
QL-XII-47	0.197628	4.54e-10	spearman	*
GSK429286A	0.199362	2.15e-09	spearman	*
Pyrimethamine	0.199784	7.82e-05	spearman	*
UNC0638	0.20219	6.65e-18	spearman	*
Ruxolitinib	0.206625	4.57e-10	spearman	*
I-CBP112	0.208148	1.9e-09	spearman	****
eEF2K Inhibitor, A-484954	0.208653	3.3e-10	spearman	*
PAC-1	0.208735	1.21e-09	spearman	****
Ara-G	0.210235	2.97e-10	spearman	*
Tenovin-6	0.210252	2.24e-10	spearman	*
Brivanib, BMS-540215	0.211835	1.5e-10	spearman	****
IPA-3	0.213522	3.36e-10	spearman	*
Trichostatin A	0.214238	1.23e-10	spearman	****
Y-39983	0.216814	6.43e-11	spearman	*
N24798-49-A1	0.218177	4.5e-11	spearman	*
VNLG/124	0.218605	5.39e-11	spearman	*
Zibotentan	0.219158	3.86e-11	spearman	*
QL-XI-92	0.219732	3.67e-11	spearman	*
YM201636	0.21997	3.68e-11	spearman	*
UNC1215	0.225586	1.4e-11	spearman	****
NG-25	0.225666	8.36e-13	spearman	*
VX-702	0.226004	6.41e-12	spearman	*
KIN001-236	0.22806	6.66e-12	spearman	*
C-75	0.228535	6.52e-12	spearman	*
Ispinesib Mesylate	0.228736	6.08e-12	spearman	*
SNX-2112	0.229911	5.72e-12	spearman	*
Torin 2	0.229936	1.34e-11	spearman	****
UNC0642	0.233933	3.46e-12	spearman	*
ARRY-520	0.234256	2.42e-12	spearman	*
KIN001-266	0.234642	1.63e-12	spearman	****
TL-1-85	0.235411	1.33e-12	spearman	****
OSI-930	0.236773	8.08e-13	spearman	*
NSC-207895	0.237978	8.43e-13	spearman	*
Amuvatinib	0.239068	6.8e-13	spearman	*
JW-7-24-1	0.239755	4.72e-13	spearman	*
MIM1	0.242548	3.49e-13	spearman	*
KIN001-244	0.242829	2.56e-13	spearman	*
CUDC-101	0.244894	2.79e-13	spearman	*
PIK-93	0.246202	1.17e-13	spearman	****
BIX02189	0.248788	6.38e-14	spearman	*
CAY10603	0.249753	6.38e-14	spearman	*
AR-42	0.249786	6.1e-14	spearman	*
Belinostat	0.250565	9.2e-14	spearman	*
Masitinib	0.250865	3.65e-14	spearman	*
KIN001-270	0.252803	2.37e-14	spearman	*
Venotoclax	0.253088	2.62e-14	spearman	*
Quizartinib	0.253593	1.83e-14	spearman	****
GSK690693	0.254308	1.77e-14	spearman	****
Methotrexate	0.254607	6.81e-15	spearman	*
T0901317	0.255158	1.59e-14	spearman	****
RU-SKI 43	0.255169	1.48e-14	spearman	****
TAK-715	0.257225	7.31e-15	spearman	*
QL-X-138	0.257568	1.02e-14	spearman	****
Pemetrexed	0.25789	1.04e-14	spearman	****
Tivozanib	0.258438	6.02e-15	spearman	*
OSI-027	0.258639	8.71e-15	spearman	*
NVP-BHG712	0.259542	4.58e-15	spearman	*
PI-103	0.259584	6.44e-15	spearman	*
Fedratinib	0.261267	2.78e-15	spearman	*
XMD14-99	0.264679	1.17e-15	spearman	****
CD532	0.265555	7.52e-16	spearman	*
KIN001-260	0.267867	5.81e-16	spearman	*
Panobinostat	0.270233	4.99e-16	spearman	*
BMS-345541	0.270505	2.52e-16	spearman	*
Tubastatin A	0.272151	1.99e-16	spearman	****
AT-7519	0.275832	1.03e-16	spearman	****
Vorinostat	0.276032	2.51e-17	spearman	*
TPCA-1	0.28286	1.03e-17	spearman	****
GSK1070916	0.283866	4.85e-17	spearman	*
WZ3105	0.287818	2.33e-18	spearman	*
I-BET-762	0.290788	1.24e-18	spearman	****
ACY-1215	0.291411	5.6e-19	spearman	*
BX-912	0.293071	5.29e-19	spearman	*
MPS-1-IN-1	0.293916	4.73e-19	spearman	*
Daporinad	0.295942	8.82e-19	spearman	*
THZ-2-102-1	0.296794	5.17e-19	spearman	*
kb NB 142-70	0.297121	1.17e-19	spearman	****
CX-5461	0.297283	2.08e-19	spearman	*
NSC319726	0.301057	2.87e-19	spearman	*
XMD13-2	0.302164	3.18e-20	spearman	*
Alisertib	0.302614	7.23e-20	spearman	*
5-Fluorouracil	0.303212	3.07e-20	spearman	*
TL-2-105	0.304723	1.29e-20	spearman	****
NPK76-II-72-1	0.306288	8.84e-21	spearman	*
PHA-793887	0.316702	6.04e-23	spearman	*
Flavopiridol	0.317028	9.67e-23	spearman	*
*p <0.05, **p <0.01, ***p < 0.001, ***p < 0.0001*.
